# Supplementary material for: Role of Staphylococcus aureus’s Buoyant Density in the Development of Biofilm Associated Antibiotic Susceptibility
Source: MDPI journal article supplement (doi:10.3390/microorganisms12040759), 2024-04-09
Supplement: s1 [file s1]

## Supplementary Material

### **Role of *Staphylococcus aureus*'s Buoyant Density in the Development of Biofilm Associated Antibiotic Susceptibility**

Sarah Kispert<sup>1,†</sup>, Madison Liguori<sup>1,†</sup>, Cody Velikaneye<sup>1</sup>, Chong Qiu<sup>1</sup>, Shue Wang<sup>1</sup>, Nan Zhang<sup>2</sup>, Huan  
Gu<sup>1,\*</sup>

<sup>1</sup>Department of Chemistry & Chemical Engineering and Biomedical Engineering, Tagliatela College of Engineering, University of New Haven, West Haven, CT 06516, United States

<sup>2</sup>Department of Pharmaceutics and Key Laboratory of Targeting Therapy and Diagnosis for Critical Diseases for Critical Diseases of Henan Province, School of Pharmaceutical Sciences, Zhengzhou University, Henan 450001, PR China

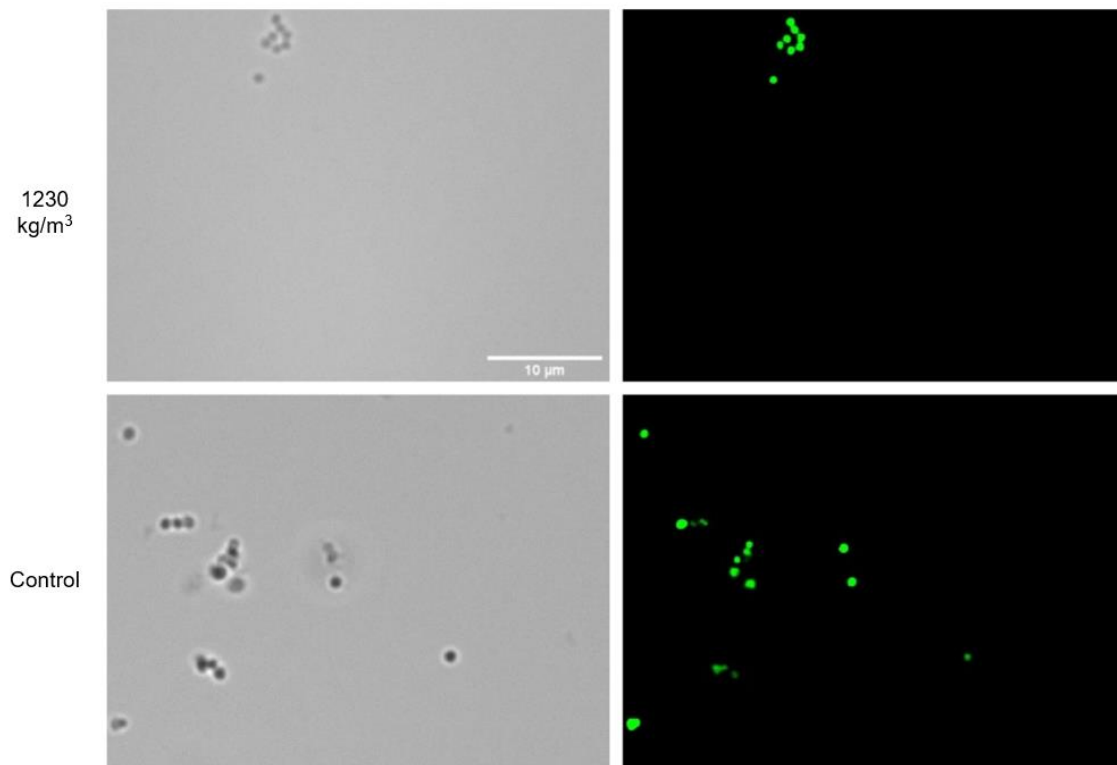

**Figure S1. DNA content of cells for 18-hour culture.** Zoomed in images of Brightfield and green fluorescence channels for *S. aureus* cells with the density of 1,230.00 kg/m<sup>3</sup>. The zoomed images of mixed *S. aureus* cells before separation are included as controls (Bar = 10 µm).
